# Supplementary material
Source: PubMed Central journal article supplement (PMC4254708)

Human bronchial  
epithelial cells

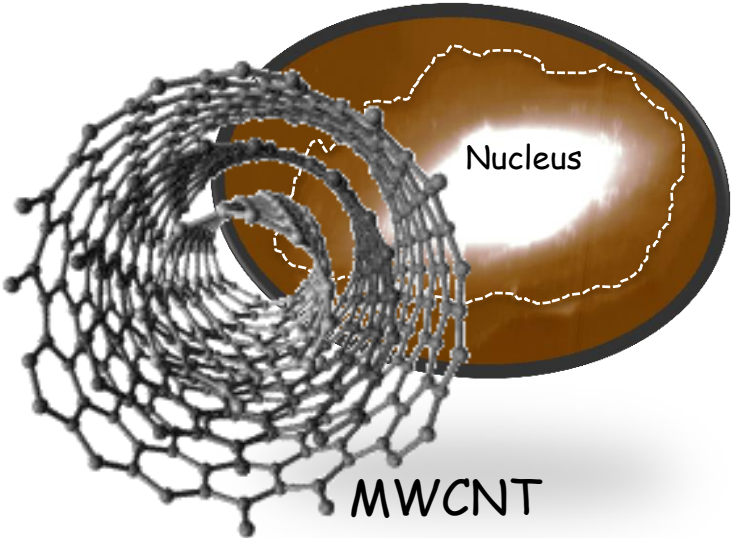

Nucleus

MWCNT

Cytotoxicity

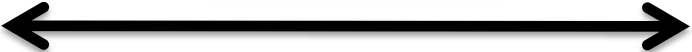

Genotoxicity

Supplement: NIHMS628886-supplement-Graphical_Abstract.pdf [file NIHMS628886-supplement-Graphical_Abstract.pdf]
